# Supplementary material for: The impact of pulse oximetry on diagnosis, management and outcomes of acute febrile illness in low-income and middle-income countries: a systematic review
Source: PubMed Central journal article supplement (PMC8627405; doi:10.1136/bmjgh-2021-007282), 2021-11-25
Supplement: bmjgh-2021-007282supp003.pdf [file bmjgh-2021-007282supp003.pdf]

**SUPPLEMENTAL APPENDIX S3****Technical Advisory Panel members**

| <b>Name</b>    | <b>Position</b>                                                                                                                                                                               | <b>Email</b>                |
|----------------|-----------------------------------------------------------------------------------------------------------------------------------------------------------------------------------------------|-----------------------------|
| Mike English   | Professor of International Child Health, University of Oxford                                                                                                                                 | menglish@kemri-wellcome.org |
| Jennifer Daily | Independent consultant in <i>in vitro</i> diagnostics and global health markets; formerly Manager – Diagnostics Access Initiatives, CHAI (Clinton Health Access Initiative)                   | jenniferanddaily@gmail.com  |
| Arjen Dondorp  | Professor of Tropical Medicine, University of Oxford                                                                                                                                          | arjen@tropmedres.ac         |
| David Bell     | Independent consultant in global health, diagnostics, and infectious disease; formerly Head of Program – Malaria and Acute Febrile Syndrome, FIND (Foundation for Innovative New Diagnostics) | bell00david@gmail.com       |

**Authors and practitioners proposed by Technical Advisory Panel**

| <b>Authors – for publication list searches</b> | <b>Practitioners – for grey literature recommendations</b> |
|------------------------------------------------|------------------------------------------------------------|
| Amy Sarah Ginsburg                             | Yasir bin Nisar                                            |
| Karin Källander                                | Martin Willi Weber                                         |
| Kevin Baker                                    | Mike Ruffo                                                 |
| Quique Bassat                                  | Cindy McWhorter                                            |
| Mark Ansermino                                 | Ann Detjen                                                 |
|                                                | Iain Wilson                                                |
|                                                | Smita Kumar                                                |
|                                                | Rasa Izadnegahdar                                          |
|                                                | Felix Lam                                                  |
