# Supplementary material for: The impact of pulse oximetry on diagnosis, management and outcomes of acute febrile illness in low-income and middle-income countries: a systematic review
Source: PubMed Central journal article supplement (PMC8627405; doi:10.1136/bmjgh-2021-007282), 2021-11-25
Supplement: bmjgh-2021-007282supp004.pdf [file bmjgh-2021-007282supp004.pdf]

## SUPPLEMENTAL APPENDIX S4

## Studies rejected at full-text review stage

| No. | Study reference                                                                                                                                                                                                                                                                                                                                                       | Reason for rejection                  |
|-----|-----------------------------------------------------------------------------------------------------------------------------------------------------------------------------------------------------------------------------------------------------------------------------------------------------------------------------------------------------------------------|---------------------------------------|
| 1   | Tanen DA, Trocinski DR. (2002) The use of pulse oximetry to exclude pneumonia in children. <i>Am J Emerg Med</i> 6:521-3.                                                                                                                                                                                                                                             | High-income country setting           |
| 2   | Starr N, Rebollo D, Asemu YM, et al. (2020) Pulse oximetry in low-resource settings during the COVID-19 pandemic. <i>Lancet Glob Health</i> 8:e1121-2.                                                                                                                                                                                                                | Peri-operative setting                |
| 3   | Enoch AJ, English M, Clinical Information Network, McGivern G, Shepperd S. (2019) Variability in the use of pulse oximeters with children in Kenyan hospitals: A mixed-methods analysis. <i>PLoS Med</i> 16:e1002987.                                                                                                                                                 | Participants not in target population |
| 4   | Cummings MJ, Goldberg E, Mwaka S, et al. (2017) A complex intervention to improve implementation of World Health Organization guidelines for diagnosis of severe illness in low-income settings: a quasi-experimental study from Uganda. <i>Implement Sci</i> 12:126.                                                                                                 | Participants not in target population |
| 5   | Tolla HS, Asemere YA, Belete AB, et al. (2018) Use of pulse oximetry for diagnosis of hypoxemia and monitoring of children with pneumonia: A descriptive study from Ethiopia. <i>Am J Trop Med Hyg</i> 99:409.                                                                                                                                                        | No valid comparator group             |
| 6   | Floyd J, Wu L, Burgess DH, Izadnegahdar R, Mukanga D, Ghani AC. (2015) Evaluating the impact of pulse oximetry on childhood pneumonia mortality in resource-poor settings. <i>Nature</i> 528:S53-9.                                                                                                                                                                   | Modelling study                       |
| 7   | Rees CA, Basnet S, Gentile A, et al. (2020) An analysis of clinical predictive values for radiographic pneumonia in children. <i>BMJ Global Health</i> 5:e002708.                                                                                                                                                                                                     | Modelling study                       |
| 8   | McCollum ED, King C, Colbourn T, et al. (2019) Pulse oximetry in paediatric primary care in low-income and middle-income countries. <i>Lancet Respir Med</i> 7:1001-2.                                                                                                                                                                                                | Opinion                               |
| 9   | Matata L, Baker K, Mucunguzi A, Posada M, Habte T, Kallander K (2015) Acceptability of selected respiratory rate counters and pulse oximeters for use by frontline health workers in the detection of pneumonia symptoms in children in sub-Saharan Africa and Southeast Asia. <i>Am J Trop Med Hyg</i> 93(4 Suppl):543.                                              | Abstract with no results              |
| 10  | Baker K, Mucunguzi A, Matata L, Posada M, Habte T, Kallander K (2015) Accuracy of selected devices for the detection of pneumonia symptoms – results from laboratory testing and field evaluations of respiratory rate counters and pulse oximeters with frontline health workers in sub-Saharan Africa and Southeast Asia. <i>Am J Trop Med Hyg</i> 93(4 Suppl):543. | Abstract with no results              |

|    |                                                                                                                                                                                                      |                  |
|----|------------------------------------------------------------------------------------------------------------------------------------------------------------------------------------------------------|------------------|
| 11 | Hamid MA, Chandna A, Siddiqui S, Fayyaz J (2016) Pulse oximetry: A reliable and cost effective screening tool in children with pneumonia for developing countries. <i>J Pak Med Assoc</i> 66:1015-8. | Narrative review |
| 12 | Herbert LJ, Wilson IH (2012) Pulse oximetry in low-resource settings. <i>Breathe</i> 9:90-7.                                                                                                         | Narrative review |
| 13 | Duke T, Subhi R, Peel D, Frey B (2009) Pulse oximetry: Technology to reduce child mortality in developing countries. <i>Ann Trop Paediatr</i> 29:165-75.                                             | Narrative review |
