# Supplementary material for: The impact of pulse oximetry on diagnosis, management and outcomes of acute febrile illness in low-income and middle-income countries: a systematic review
Source: PubMed Central journal article supplement (PMC8627405; doi:10.1136/bmjgh-2021-007282), 2021-11-25
Supplement: bmjgh-2021-007282supp005.pdf [file bmjgh-2021-007282supp005.pdf]

**GENERAL INFORMATION**

Extraction date

Citation

Publication type

**ELIGIBILITY**

Eligibility criteria met

Type of study

Participants

Intervention

Comparison

Outcome measures

**METHODS**

Aim

Design

Unit of allocation

Start date

End date

Duration of participation

Ethical approval needed/obtained

**PARTICIPANTS**

Population

Setting

Inclusion criteria

Exclusion criteria

Method of recruitment

Informed consent

Total population at start

Clusters

Baseline imbalances

Withdrawals and exclusions

Demographics

**GROUPS**

Intervention and comparison

Description of intervention

Treatment duration

Timing

Delivery

Providers

Co-intervention

Economic information

Resource requirements

Integrity of delivery

Compliance

**RELEVANT OUTCOMES**

Outcome name  
Time points measured  
Time points reported  
Outcome definition  
Person measuring/reporting  
Outcome validated  
Imputation of missing data  
Assumed risk estimate  
Power

**OTHER**

Funding sources  
Conflicts of interest

**DATA AND ANALYSIS**

Results  
Any other results  
Missing participants  
Unit of analysis  
Statistical methods and appropriateness  
Reanalysis required  
Reanalysis possible

**CONCLUSIONS**

Key findings  
Correspondence required
